# Supplementary material
Source: HighWire-hosted journal article supplement (https://bmjopen.bmj.com/content/12/9/e062178)
Supplement: inline-supplementary-material-1 [file inline-supplementary-material-1.pdf]

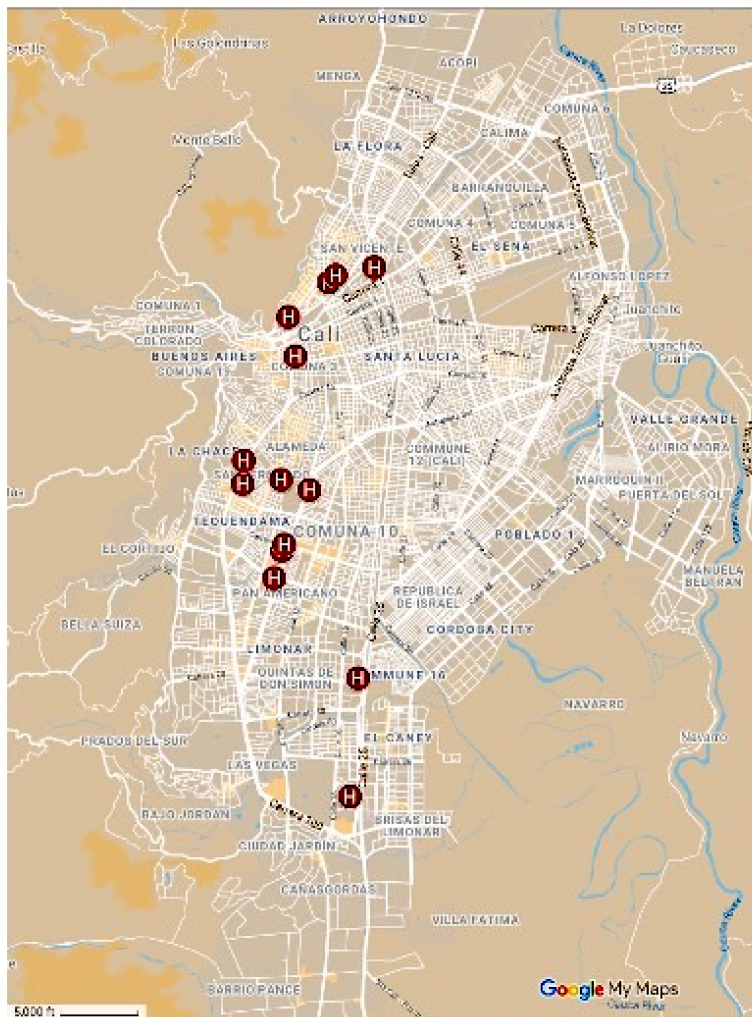

| <b>Institution</b>                                             |
|----------------------------------------------------------------|
| <b>Centro Médico Imbanaco</b>                                  |
| <b>Clínica Amiga</b>                                           |
| <b>Clínica Colombia ES</b>                                     |
| <b>Clínica Colsanitas S.A. Sebastián de Belalcazar</b>         |
| <b>Clínica de Occidente</b>                                    |
| <b>Clínica Esensa</b>                                          |
| <b>Clínica Farallones S.A.</b>                                 |
| <b>Clinica Nuestra</b>                                         |
| <b>Clínica Nuestra Señora de los Remedios</b>                  |
| <b>Clínica Nueva de Cali SAS Sede La Quinta</b>                |
| <b>Clínica Rey David</b>                                       |
| <b>DIME Clínica Neurocardiovascular S.A.</b>                   |
| <b>Hospital Universitario del Valle Evaristo García E.S.E.</b> |
| <b>Fundación Valle de Lili</b>                                 |
